# Supplementary material for: Chemical control of xylem differentiation by thermospermine, xylemin, and auxin
Source: PubMed Central journal article supplement (PMC4754900; doi:10.1038/srep21487), 2016-02-16
Supplement: srep21487-s1.pdf [file srep21487-s1.pdf]

Yoshimoto, K., Takamura, H., Kadota, I.,  
Motose, H. & Takahashi, T.

Chemical control of xylem differentiation by  
thermospermine, xylemin, and auxin

Supplementary Figures S1-S8

Supplementary Fig. S1

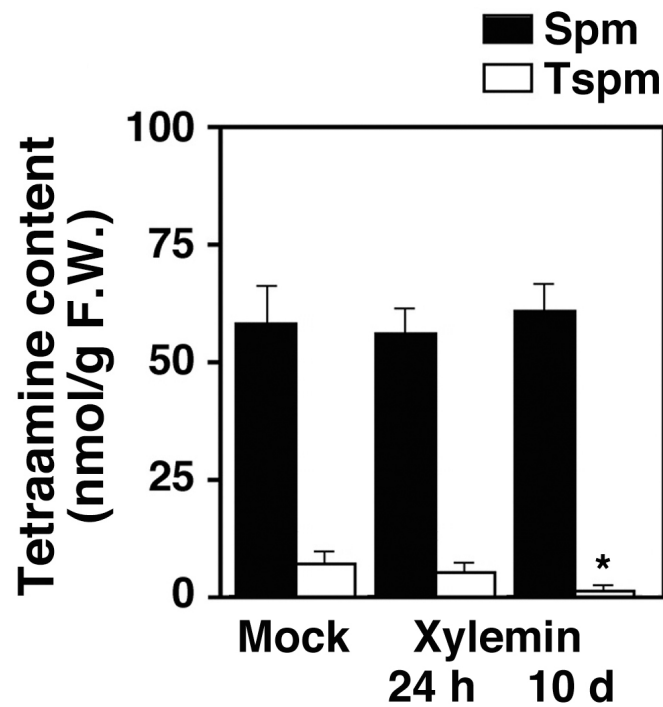

**Supplementary Figure S1 | Tetraamine content in wild-type seedlings grown with xylemin.** Wild-type seedlings were grown for 10 days in the MS liquid medium without xylemin (Mock), grown for 9 days and treated for 24 h with 30  $\mu$ M xylemin (24 h), or grown for 10 days with 30  $\mu$ M xylemin (10 d). Benzoylated polyamines were measured by HPLC. Data are displayed as averages  $\pm$  SD ( $n = 3$ ). Asterisk indicates a significant difference from the value in the mock treatment (Student  $t$ -test,  $P < 0.01$ ).

Yoshimoto, K., Takamura, H., Kadota, I., Motose, H. & Takahashi, T.  
Chemical control of xylem differentiation by thermospermine, xylemin, and auxin

## Supplementary Fig. S2

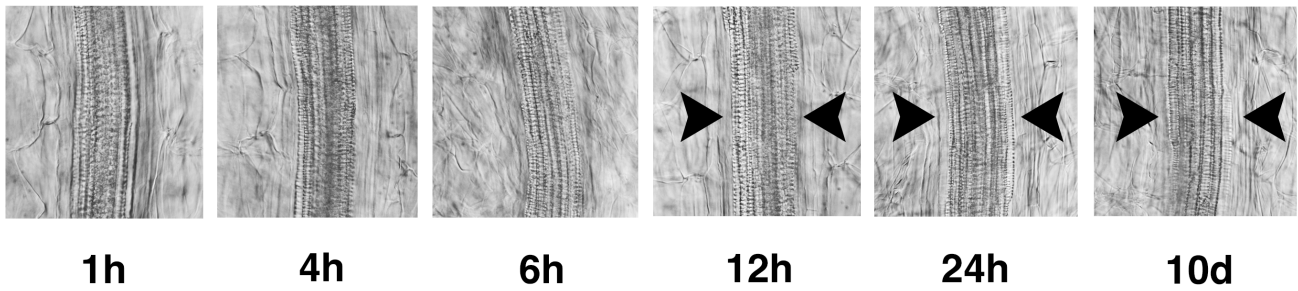

**Supplementary Figure S2 | Changes in the responsiveness to xylemin during vascular development.** The wild type seedlings were germinated and grown for 10 days in the liquid medium. Xylemin was added at various times of culture [1, 4, 6, 12, or 24 hours (h), or 10 days (at the start of culture) before fixation and observation] and xylem differentiation in hypocotyls was observed.

Yoshimoto, K., Takamura, H., Kadota, I., Motose, H. & Takahashi, T.  
Chemical control of xylem differentiation by thermospermine, xylemin, and auxin

## Supplementary Fig. S3

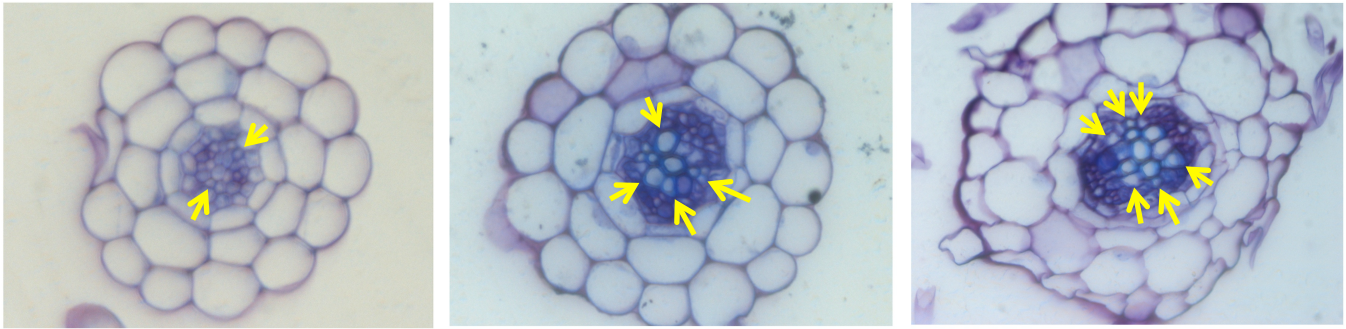

**WT**

**WT+xylemin**

***acl5***

**Supplementary Figure S3 | Effect of xylemin on xylem differentiation in the root.** Seedlings of the wild type were germinated and grown for 7 days in the medium without (WT) or with 50  $\mu$ M xylemin (+ xylemin). The *acl5-1* mutant seedlings were germinated and grown for 7 days in the medium without xylemin. Arrows indicate xylem vessel elements.

Yoshimoto, K., Takamura, H., Kadota, I., Motose, H. & Takahashi, T.  
Chemical control of xylem differentiation by thermospermine, xylemin, and auxin

Supplementary Fig. S4

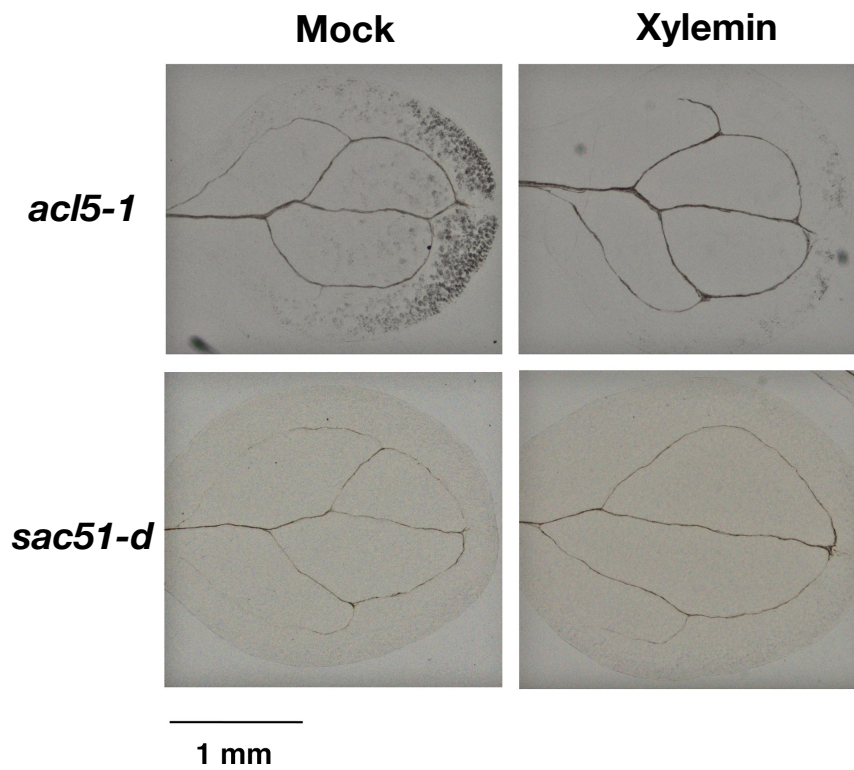

**Supplementary Figure S4 | Effect of xylemin on xylem differentiation in *acl5-1* and *sac51-d*.** Seedlings of the *acl5-1* or *sac51-d* mutants were germinated and grown for 7 days in the medium without (Mock) or with 50  $\mu$ M xylemin (+Xylemin).

Yoshimoto, K., Takamura, H., Kadota, I., Motose, H. & Takahashi, T.  
Chemical control of xylem differentiation by thermospermine, xylemin, and auxin

## Supplementary Fig. S5

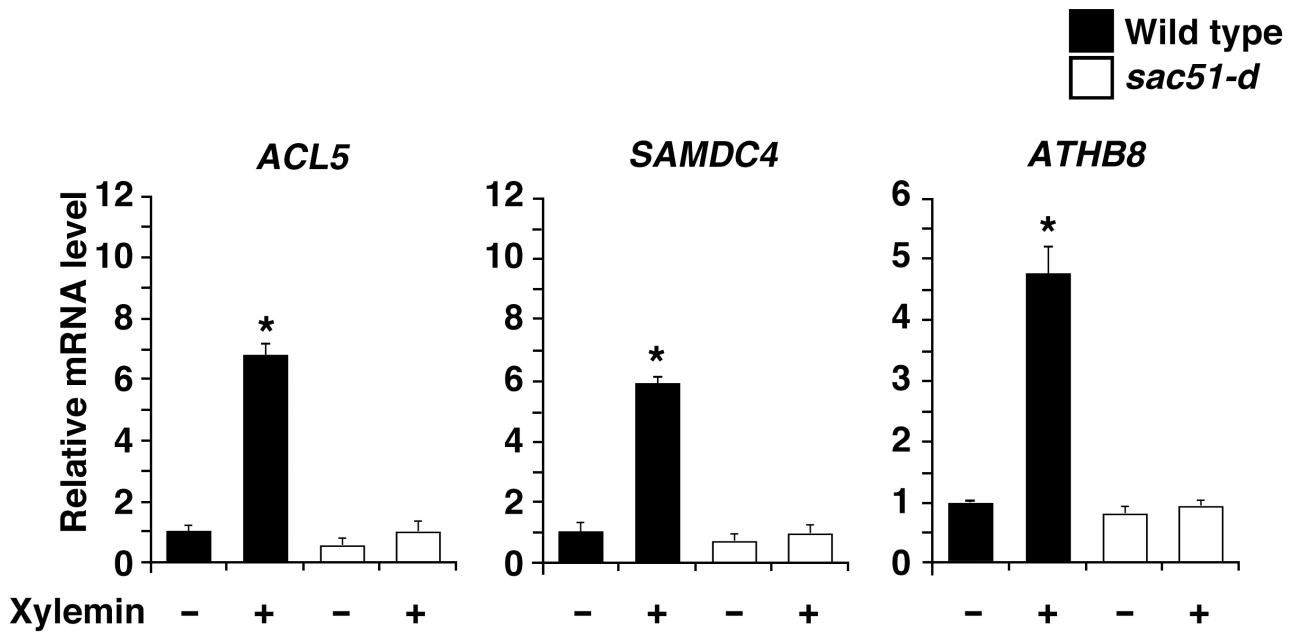

**Supplementary Figure S5 | Effect of xylemin on gene expression in the wild type (WT) and *sac51-d*.** Total RNA was isolated from seedlings of the wild type or *sac51-d* germinated and grown for 7 days in the liquid medium without (-) or with 50  $\mu$ M xylemin (+). All transcript levels are relative to those in mock-treated seedlings. Data are displayed as averages  $\pm$  SD ( $n = 3$ ). Asterisk indicates significant difference from the value in the mock treatment (Student *t*-test,  $P < 0.05$ )

Yoshimoto, K., Takamura, H., Kadota, I., Motose, H. & Takahashi, T.  
Chemical control of xylem differentiation by thermospermine, xylemin, and auxin

Supplementary Fig. S6

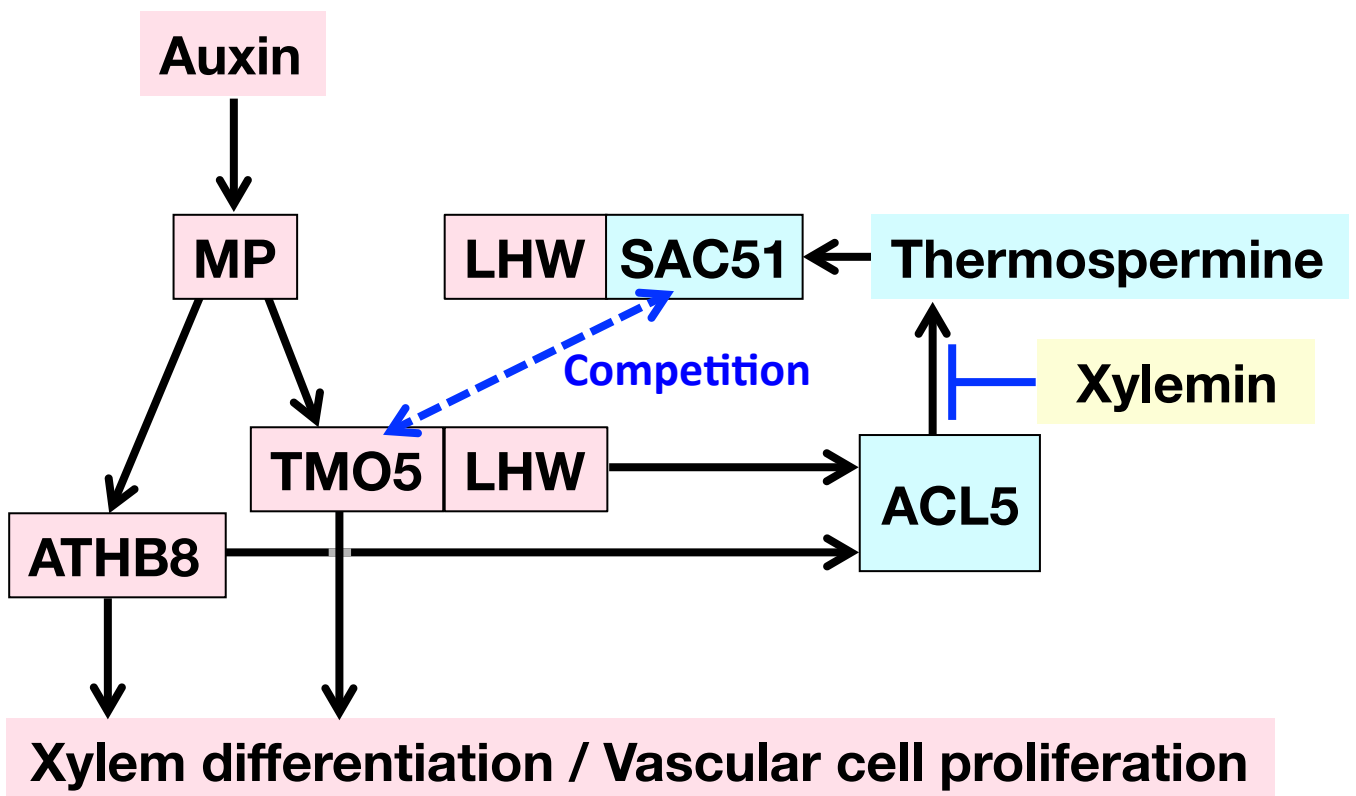

**Supplementary Figure S6 | A model of thermospermine-mediated negative feedback regulation of auxin-inducible xylem differentiation.** A putative model of thermospermine-mediated negative feedback regulation.

Yoshimoto, K., Takamura, H., Kadota, I., Motose, H. & Takahashi, T.  
Chemical control of xylem differentiation by thermospermine, xylemin, and auxin

## Supplementary Fig. S7

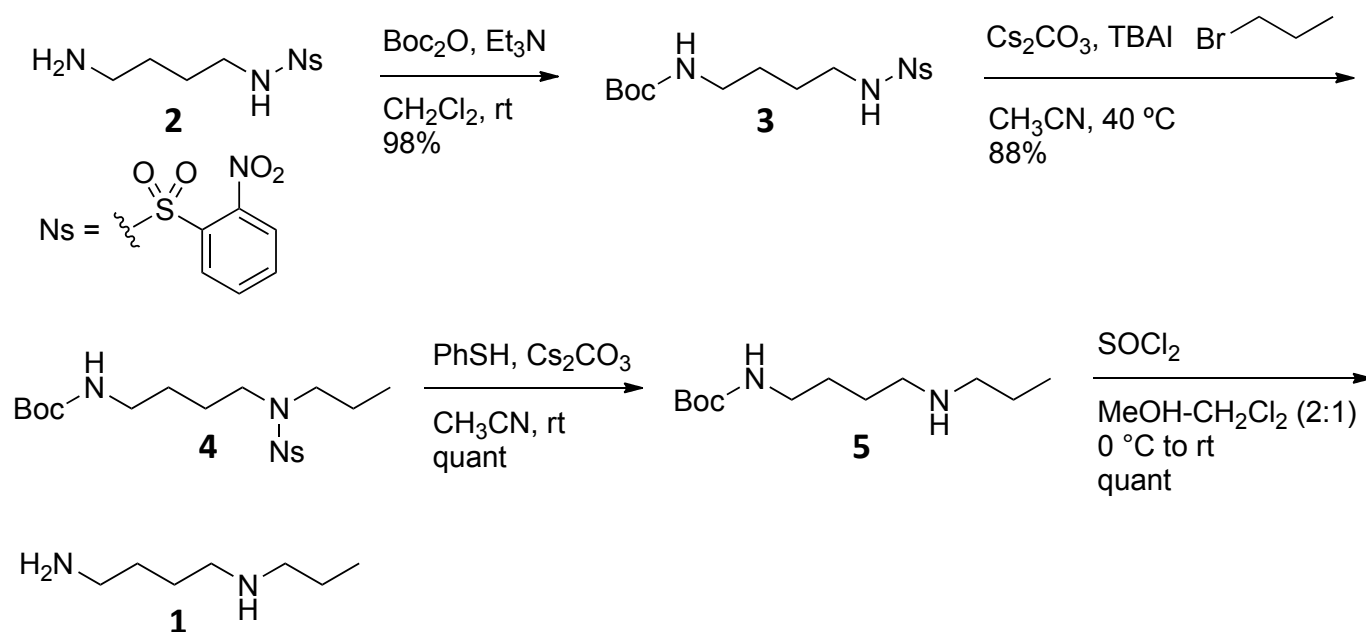

### Supplementary Figure S7 | Synthetic scheme of xylemin.

Yoshimoto, K., Takamura, H., Kadota, I., Motose, H. & Takahashi, T.

Chemical control of xylem differentiation by thermospermine, xylemin, and auxin



## Supplementary Fig. S8

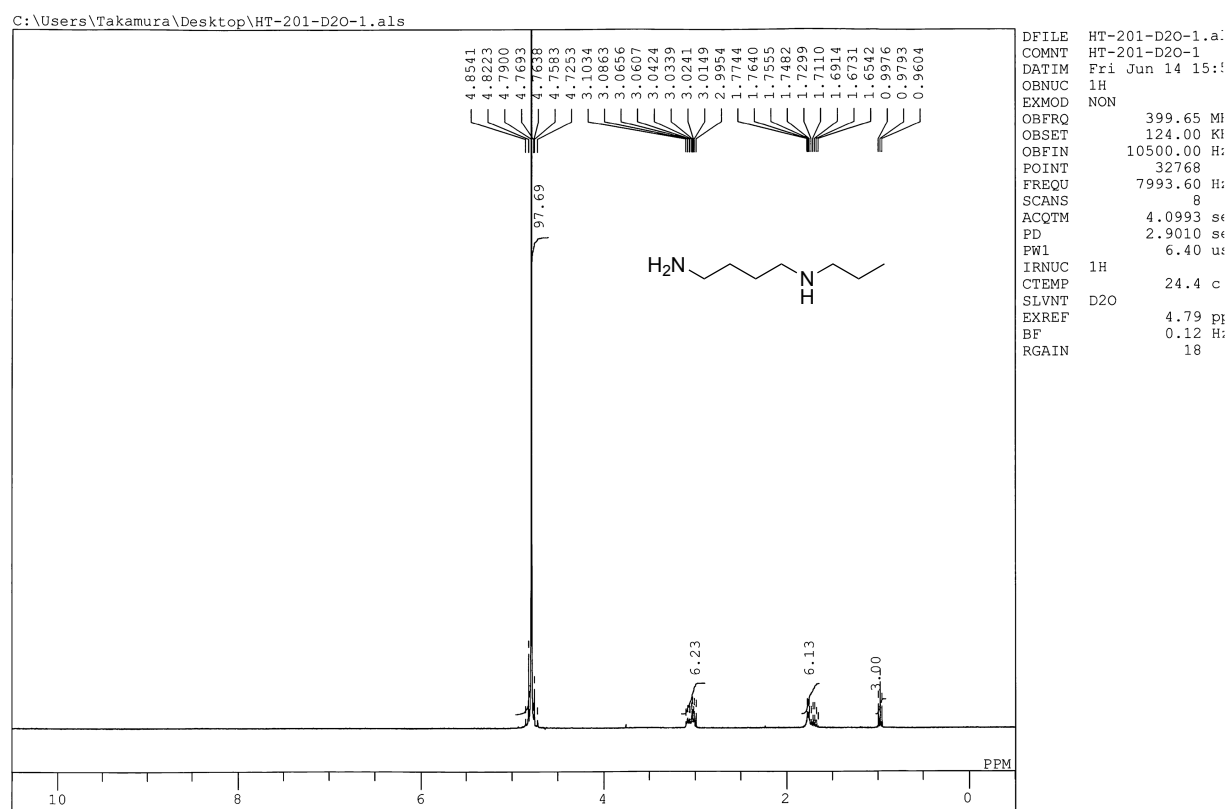

Supplementary Figure S8 |  $^1\text{H}$  NMR spectrum of synthesized xylemin.

Yoshimoto, K., Takamura, H., Kadota, I., Motose, H. & Takahashi, T.  
Chemical control of xylem differentiation by thermospermine, xylemin, and auxin
